1 **Derivation and Internal Validation of Prediction Models for**  
2 **Pulmonary Hypertension Risk Assessment in a Cohort**  
3 **Inhabiting Tibet, China**

4 **Authors**

5 Junhui Tang<sup>1†</sup>, Rui Yang<sup>2†</sup>, Hui Li<sup>1</sup>, Xiaodong Wei<sup>1</sup>, Zhen Yang<sup>1</sup>, Wenbin Cai<sup>1</sup>, Yao  
6 Jiang<sup>1</sup>, Ga Zhuo<sup>1</sup>, Li Meng<sup>1</sup>, Yali Xu<sup>3\*</sup>

7 Junhui Tang<sup>†</sup> and Rui Yang<sup>†</sup> contributed equally to this work.

8

9 **Affiliations**

- 10 1. Department of Ultrasound, the General Hospital of Tibet Military Command, Tibet, China  
11 2. Department of High Mountain Sickness, the General Hospital of Tibet Military Command,  
12 Tibet, China  
13 3. Department of Ultrasound, Xinqiao Hospital, Army Medical University, Chongqing, China

14

15 **Corresponding author \***

16 Yali Xu, MD, PhD  
17 Department of Ultrasound, Xinqiao Hospital, Army Medical University, 83 Xinqiao Main Street,  
18 Shapingba District, Chongqing, 400037, PR China.  
19 E-mail address: [xuyali1976@163.com](mailto:xuyali1976@163.com)

20

21 **Abstract**

22 **Background:** Due to exposure to hypoxic environments, individuals residing in plateau regions  
23 are susceptible to pulmonary hypertension (PH). Consequently, there is an urgent need for a  
24 simple and efficient nomogram to assess the risk of PH in this population.

25 **Methods:** This study included a total of 6,603 subjects, who were randomly divided into a  
26 validation set and a derivation set at a ratio of 7:3. Optimal predictive features were identified  
27 through the least absolute shrinkage and selection operator regression technique, and nomograms  
28 were constructed using multivariate logistic regression. The performance of these nomograms was  
29 evaluated and validated using the area under the curve (AUC), calibration curves, the  
30 Hosmer-Lemeshow test, and decision curve analysis. Comparisons between nomograms were  
31 conducted using the net reclassification improvement (NRI) and integrated discrimination  
32 improvement (IDI) indices.

33 **Results:** Nomogram<sup>I</sup> was established based on independent risk factors, including gender, Tibetan  
34 ethnicity, age, incomplete right bundle branch block (IRBBB), atrial fibrillation (AF), sinus  
35 tachycardia (ST), and T wave changes (TC). The AUCs for Nomogram<sup>I</sup> were 0.716 in the  
36 derivation set and 0.718 in the validation set. Nomogram<sup>II</sup> was established based on independent  
37 risk factors, including Tibetan ethnicity, age, right axis deviation (RAD), high voltage in the right  
38 ventricle (HVRV), IRBBB, AF, pulmonary P waves, ST, and TC. The AUCs for Nomogram<sup>II</sup> were  
39 0.844 in the derivation set and 0.801 in the validation set. Both nomograms demonstrated  
40 satisfactory clinical consistency. The IDI and NRI indices confirmed that Nomogram<sup>II</sup>  
41 outperformed Nomogram<sup>I</sup>. Therefore, the online dynamic Nomogram<sup>II</sup> was established.

42 **Conclusions:** A reliable and straightforward nomogram was developed to predict the risks of PH  
43 in the plateau population.

44

45 **Introduction**

46 Pulmonary hypertension (PH) is a chronic, progressive condition characterised by elevated  
47 pulmonary arterial pressure, primarily resulting from pulmonary vascular remodelling. This  
48 remodelling is driven by the infiltration of inflammatory cells, endothelial-to-mesenchymal  
49 transition, and hyperplasia of the pulmonary intima (Rubin & Naeije, 2023; Shah, Beckmann,  
50 Vorla, & Kalra, 2023; Simonneau et al., 2019). PH often presents similarly to other lung diseases,  
51 leading to diagnostic delays and, consequently, delays in receiving optimal treatment.  
52 Approximately 1% of the adult population and more than half of individuals with congestive heart  
53 failure are affected by PH (Hoepfer et al., 2016; Mandras, Mehta, & Vaidya, 2020). Moreover, as  
54 the pulmonary vascular load increases, PH can ultimately lead to life-threatening right heart  
55 failure. The 1-year and 3-year survival rates for patients with PH range from 68% to 93% and 39%  
56 to 77%, respectively (Naeije, Richter, & Rubin, 2022; Ruopp & Cockrill, 2022).

57 Right-heart catheterisation (RHC) is recognised as the gold standard for diagnosing PH,  
58 clarifying the specific diagnosis, and determining the severity of the condition. However, due to its  
59 invasive nature, RHC is not suitable as a widespread population screening tool for PH (McGoon et  
60 al., 2004). Transthoracic echocardiography (TTE), a non-invasive screening test, is extensively  
61 used for PH because it can provide estimates of pulmonary arterial systolic pressure (sPAP) and  
62 evaluates cardiac structure and function. A clinical study involving 731 patients in China found no  
63 significant difference between RHC and TTE in assessing sPAP in PH caused by hypoxia.  
64 Furthermore, Pearson correlation analysis between RHC and TTE demonstrated a moderate  
65 overall correlation (Hong et al., 2023; McGoon et al., 2004; Xu & Jing, 2009).

66           According to literature reviews, nearly 140 million individuals reside in high-altitude regions  
67    (altitudes exceeding 2,500 meters), and the number of people visiting these areas for economic or  
68    recreational reasons has been increasing over the past few decades (Moore, Niermeyer, &  
69    Zamudio, 1998; West, 2012; Xu & Jing, 2009). High altitude typically signifies a hypoxic  
70    environment due to the decrease in barometric pressure as altitude increases, which proportionally  
71    reduces PO<sub>2</sub>, resulting in hypobaric hypoxia (Gassmann et al., 2021). PH arising from prolonged  
72    exposure to hypoxic conditions at high altitudes is termed high-altitude pulmonary hypertension  
73    (Xu & Jing, 2009). Hypoxia triggers hypoxic pulmonary vasoconstriction (HPV), a physiological  
74    response aimed at optimising ventilation/perfusion matching by redirecting blood to  
75    better-oxygenated segments of the lung through the constriction of small pulmonary arteries  
76    (Dunham-Snary et al., 2017). Furthermore, sustained hypoxia leads to pulmonary vascular  
77    remodelling, increasing resistance to blood flow due to reduced vessel elasticity and decreased  
78    vessel diameter. HPV and vascular remodelling are the primary mechanisms underlying  
79    hypoxia-induced PH, which significantly impairs right ventricular function and can ultimately  
80    result in fatal heart failure (Julian & Moore, 2019; Penaloza & Arias-Stella, 2007). Consequently,  
81    there is a pressing need for a straightforward and dependable model to assist clinicians and  
82    individuals in assessing the risk of PH in populations at high altitudes.

83           In this study, we developed and validated two risk prediction models for high-altitude PH  
84    based on TTE results by examining routine inspection parameters in Tibet, China.

85

## 86    **Materials and methods**

87           *Study population and data collection*

88           Upon gathering data from all patients who underwent both TTE and 12-lead  
89   electrocardiogram (ECG) examinations at the General Hospital of Tibet Military Command  
90   between April 2021 and October 2023, we further screened the records based on the following  
91   criteria: (1) age > 14 years; (2) interval between the TTE and ECG examinations < 2 months, and  
92   (3) for patients with multiple TTE and/or ECG records, only the examination with the shortest  
93   interval between TTE and ECG was selected. Ultimately, we compiled examination data for 6,603  
94   eligible patients.

95           The retrospectively-collected clinical data were categorised into two main groups: (1)  
96   demographic characteristics, including name, age, gender, and Tibetan ethnicity; (2) ECG results,  
97   encompassing right axis deviation (RAD), clockwise rotation (CR), counterclockwise rotation  
98   (CCR), high voltage in the right ventricle (HVRV), incomplete right bundle branch block  
99   (IRBBB), complete right bundle branch block (CRBBB), atrial fibrillation (AF), sinus arrhythmia  
100   (SA), sinus bradycardia (SB), sinus tachycardia (ST), T wave changes (TC), ST-segment changes  
101   (STC), atrial premature beats (APB), ventricular premature beats (VPB), junctional premature  
102   beats (JPB), complete left bundle branch block (CLBBB), first-degree atrioventricular block  
103   (IAB), and pulmonary P waves (PP); (3) TTE results: pulmonary arterial systolic pressure (sPAP)  
104   was measured via TTE to evaluate PH. PH was graded as follows: Grade I PH ( $50 \text{ mmHg} > \text{sPAP}$   
105    $\geq 30 \text{ mmHg}$ ), Grade II PH ( $70 \text{ mmHg} > \text{sPAP} \geq 50 \text{ mmHg}$ ), and Grade III PH ( $\text{sPAP} \geq 70$   
106    $\text{mmHg}$ ). The severity of PH increases with its grade, indicating a higher risk of the condition.

107           All procedures were conducted following the approval of the Ethics Committee of the  
108   General Hospital of Tibet Military Command (APPROVAL NUMBER: 2024-KD002-01).  
109   Subsequently, the data from all participants were anonymised and de-identified prior to analysis.

110 Consequently, the requirement for informed consent was waived.

111

112 *Statistical analysis*

113

114 Statistical analysis was performed with R software version 4.3.2.  $P < 0.05$  (double-tailed)

115 was considered statistically significant.

116 For validation and derivation of the prediction model, subjects were divided into a

117 validation set and a derivation set randomly, at a ratio of 7:3, respectively. Categorical variables

118 were transformed into dichotomous variables, and continuous variables were expressed by

119 concrete values (means  $\pm$  standard deviation) and analysed using Student's t-test. Fisher's exact

120 test or Pearson's  $\chi^2$  test was applied for categorical variables.

121 The derivation set was used to select optimal predictive factors through the least absolute

122 shrinkage and selection operator (LASSO) regression technique. Independent factors were

123 identified via multivariate logistic regression analysis, incorporating variables selected during the

124 LASSO regression. A backward step-down selection process, guided by the Akaike information

125 criterion, determined the final model. The predictive accuracy of the nomograms was assessed

126 using the AUC of the ROC curve in both the derivation and validation sets. The

127 Hosmer-Lemeshow test and calibration curves were employed to evaluate the consistency between

128 actual outcomes and predicted probabilities. The clinical utility of the nomograms was assessed

129 through decision curve analysis (DCA). The cut-off value for the total score in the nomogram was

130 established based on the ROC curve, with patients categorised into low-risk and high-risk groups.

131 The performance comparison between nomograms was analysed using the integrated

132 discrimination improvement (IDI) and net reclassification improvement (NRI).

133

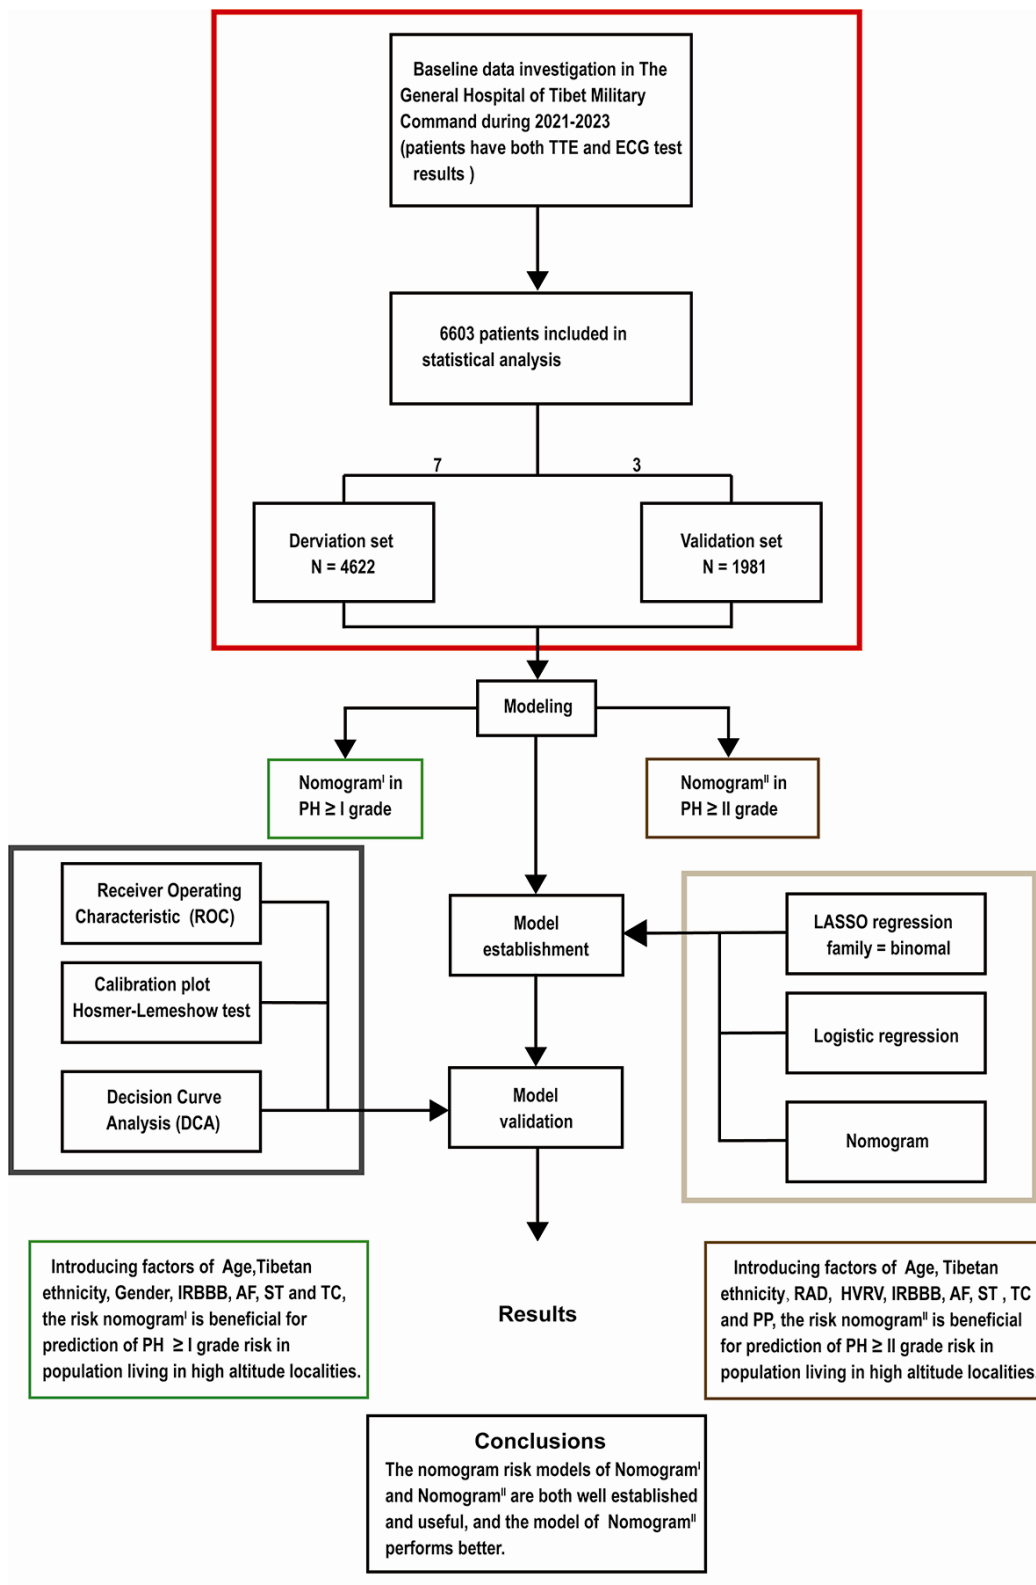

134

135

136 Figure 1. Flow diagram. Based on the exclusion and inclusion criteria, 6,603 patients were  
137 included in this study. Patients were divided into a validation set and a derivation set randomly  
138 following a 7:3 ratio. pulmonary hypertension, PH; right axis deviation, RAD; high voltage in the  
139 right ventricle, HVRV; incomplete right bundle branch block, IRBBB; atrial fibrillation, AF; sinus  
140 tachycardia, ST; T wave changes, TC; Pulmonary P waves, PP.

141

## 142 Results

143

144 **Table 1. Baseline characteristics of individuals in the derivation and validation**  
145 **sets**

| Variable          | Derivation set (n = 4622) | Validation set (n = 1981) | P     |
|-------------------|---------------------------|---------------------------|-------|
| Age               |                           |                           |       |
| Total (Mean ± SD) | 42.43 ± 16.93             | 42.05 ± 16.41             | 0.390 |
| Age ≤ 42, n (%)   | 2619(56.66)               | 1135(57.29)               |       |
| Age > 42, n (%)   | 2003(43.34)               | 846(42.71)                | 0.635 |
| Tibetan, n (%)    |                           |                           | 0.538 |
| No                | 2856 (61.79)              | 1240 (62.59)              |       |
| Yes               | 1766 (38.21)              | 741 (37.41)               |       |
| Gender, n (%)     |                           |                           | 0.260 |
| female            | 1219 (26.37)              | 549 (27.71)               |       |



|              |              |              |       |
|--------------|--------------|--------------|-------|
| male         | 3403 (73.63) | 1432 (72.29) |       |
| RAD, n (%)   |              |              | 0.141 |
| No           | 3833 (82.93) | 1672 (84.40) |       |
| Yes          | 789 (17.07)  | 309 (15.60)  |       |
| CR, n (%)    |              |              | 0.387 |
| No           | 4000 (86.54) | 1730 (87.33) |       |
| Yes          | 622 (13.46)  | 251 (12.67)  |       |
| CCR, n (%)   |              |              | 0.402 |
| No           | 3994 (86.41) | 1727 (87.18) |       |
| Yes          | 628 (13.59)  | 254 (12.82)  |       |
| HVRV, n (%)  |              |              | 0.102 |
| No           | 4151 (89.81) | 1805 (91.12) |       |
| Yes          | 471 (10.19)  | 176 (8.88)   |       |
| IRBBB, n (%) |              |              | 0.573 |
| No           | 4547 (98.38) | 1945 (98.18) |       |
| Yes          | 75 (1.62)    | 36 (1.82)    |       |
| CRBBB, n (%) |              |              | 0.945 |
| No           | 4444 (96.15) | 1904 (96.11) |       |
| Yes          | 178 (3.85)   | 77 (3.89)    |       |
| AF, n (%)    |              |              | 0.594 |

|            |              |              |       |
|------------|--------------|--------------|-------|
| No         | 4551 (98.46) | 1954 (98.64) |       |
| Yes        | 71 (1.54)    | 27 (1.36)    |       |
| SA, n (%)  |              |              | 0.243 |
| No         | 4247 (91.89) | 1837 (92.73) |       |
| Yes        | 375 (8.11)   | 144 (7.27)   |       |
| ST, n (%)  |              |              | 0.910 |
| No         | 4395 (95.09) | 1885 (95.15) |       |
| Yes        | 227 (4.91)   | 96 (4.85)    |       |
| SB, n (%)  |              |              | 0.345 |
| No         | 4245 (91.84) | 1833 (92.53) |       |
| Yes        | 377 (8.16)   | 148 (7.47)   |       |
| TC, n (%)  |              |              | 0.769 |
| No         | 4003 (86.61) | 1721 (86.88) |       |
| Yes        | 619 (13.39)  | 260 (13.12)  |       |
| STC, n (%) |              |              | 0.415 |
| No         | 4399 (95.18) | 1876 (94.70) |       |
| Yes        | 223 (4.82)   | 105 (5.30)   |       |
| APB, n (%) |              |              | 0.219 |
| No         | 4587 (99.24) | 1960 (98.94) |       |
| Yes        | 35 (0.76)    | 21 (1.06)    |       |

|                          |              |              |       |
|--------------------------|--------------|--------------|-------|
| JPB, n (%)               |              |              | 0.425 |
| No                       | 4603 (99.59) | 1970 (99.44) |       |
| Yes                      | 19 (0.41)    | 11 (0.56)    |       |
| VPB, n (%)               |              |              | 0.844 |
| No                       | 4580 (99.09) | 1962 (99.04) |       |
| Yes                      | 42 (0.91)    | 19 (0.96)    |       |
| PP, n (%)                |              |              | 0.439 |
| No                       | 4507 (97.51) | 1938 (97.83) |       |
| Yes                      | 115 (2.49)   | 43 (2.17)    |       |
| CLBBB, n (%)             |              |              | 0.757 |
| No                       | 4610 (99.74) | 1975 (99.70) |       |
| Yes                      | 12 (0.26)    | 6 (0.30)     |       |
| IAB, n (%)               |              |              | 0.910 |
| No                       | 4556 (98.57) | 1952 (98.54) |       |
| Yes                      | 66 (1.43)    | 29 (1.46)    |       |
| PH $\geq$ I grade, n (%) |              |              | 0.820 |
| No                       | 2793 (60.43) | 1203 (60.73) |       |
| Yes                      | 1829 (39.57) | 778 (39.27)  |       |
| PH $\geq$ II grade, n(%) |              |              | 0.962 |
| No                       | 4227 (91.45) | 1811 (91.42) |       |

|     |            |            |
|-----|------------|------------|
| Yes | 395 (8.55) | 170 (8.58) |
|-----|------------|------------|

---

146

147 *Subjects' characteristics*

148

149 Following a 7:3 allocation ratio, 4,622 subjects were placed in the derivation set and 1,981

150 subjects in the validation set. The characteristics of the subjects are presented in Table 1. The

151 prevalence of PH of Grade I or higher was 39.57% (1,829 cases) in the derivation set and 39.27%

152 (778 cases) in the validation set ( $P=0.820 > 0.05$ ). The prevalence of PH of Grade II or higher was

153 8.55% (395 cases) in the derivation set and 8.58% (170 cases) in the validation set ( $P=0.962 >$

154  $0.05$ ). No significant difference was observed in the age distribution between the derivation and

155 validation sets ( $42.43 \pm 16.93$  vs.  $42.05 \pm 16.41$ ,  $P=0.390 > 0.05$ ), with age categorised into  $\leq 42$

156 and  $>42$  subgroups based on the mean age. The composition ratios of the two age subgroups did

157 not significantly differ between the validation and derivation sets ( $P=0.6352 > 0.05$ ). Furthermore,

158 no significant differences were observed in the characteristics related to gender, Tibetan or not,

159 RAD, CR, CCR, HVRV, IRBBB, CRBBB, AF, SA, ST, SB, TC, STC, APB, VPB, JPB, PP, IAB,

160 and CLB BB. (Table 1)

161

162 *Independent risk factors in PH $\geq$ I grade group and PH $\geq$ II grade group*

163

164 In the PH $\geq$ I grade group, based on the  $\lambda_{\min}$  criterion in the LASSO regression model, 18

165 out of 22 variables were selected. However, this selection was deemed excessive for practical

166 clinical applications. Therefore, we further refined the model using the  $\lambda_{1se}$  criterion, which

167 reduced the number of variables, albeit with a significant decrease in the AUC of the ROC curve

168 ( $\lambda_{1se}$ ) compared to the ROC curve ( $\lambda_{\min}$ ) (Fig. 2 C, E, G). Ultimately, 9 variables were chosen

169 according to  $\lambda_{1se}$ , including gender, Tibetan ethnicity, age  $\leq 42$ , age  $>42$ , IRBBB, CRBBB, AF,  
 170 ST, and TC (Fig. 2 I). Gender, Tibetan ethnicity, age, IRBBB, AF, ST, and TC were subsequently  
 171 identified as independent risk factors for PH $\geq$ I grade through multivariate logistic regression  
 172 analysis and were used to develop Nomogram<sup>I</sup>. (Table 2)

173 In the PH $\geq$ II grade group, based on the  $\lambda_{1se}$  criterion in the LASSO regression model (Fig.  
 174 2 D, F), 11 variables were selected to align with clinical needs. These variables were Tibetan  
 175 ethnicity, age  $\leq 42$ , age  $>42$ , RAD, HVRV, IRBBB, CRBBB, AF, PP, ST, and TC (Fig. 2 J).  
 176 Tibetan ethnicity, age, RAD, HVRV, IRBBB, AF, PP, ST, and TC were determined to be  
 177 independent risk factors for PH $\geq$ II grade through multivariate logistic regression analysis and  
 178 were utilised to construct Nomogram<sup>II</sup>. (Table 3).

179

180 **Table 2. Risk factors for PH $\geq$ I grade in the derivation set**

| Variable | $\beta$<br>-Coefficient | OR (95%CI)       | P      |
|----------|-------------------------|------------------|--------|
| Tibetan  | 0.34                    | 1.40 (1.23-1.60) | <0.001 |
| Gender   | -0.3                    | 0.74 (0.65-0.84) | <0.001 |
| Age      | 0.034                   | 1.03 (1.03-1.04) | <0.001 |
| IRBBB    | 1.106                   | 3.02 (1.96-4.67) | <0.001 |
| AF       | 1.431                   | 4.18 (2.19-7.97) | <0.001 |
| ST       | 0.369                   | 1.45 (1.14-1.84) | 0.003  |
| TC       | 0.306                   | 1.36 (1.16-1.59) | <0.001 |

181

182 **Table 3. Risk factors for PH $\geq$ II grade in the derivation set**

| Variable | $\beta$<br>-Coefficient | OR (95%CI)        | P      |
|----------|-------------------------|-------------------|--------|
| Tibetan  | 0.689                   | 1.99 (1.55-2.57)  | <0.001 |
| Age      | 0.042                   | 1.04 (1.03-1.05)  | <0.001 |
| RAD      | 0.751                   | 2.12 (1.56-2.88)  | <0.001 |
| HVRV     | 0.486                   | 1.63 (1.14-2.31)  | 0.007  |
| IRBBB    | 1.512                   | 4.53 (2.77-7.42)  | <0.001 |
| AF       | 2.102                   | 8.18 (5.13-13.05) | <0.001 |
| ST       | 1.247                   | 3.48 (2.58-4.70)  | <0.001 |
| TC       | 0.592                   | 1.81 (1.44-2.27)  | <0.001 |
| PP       | 1.486                   | 4.42 (2.96-6.61)  | <0.001 |

183

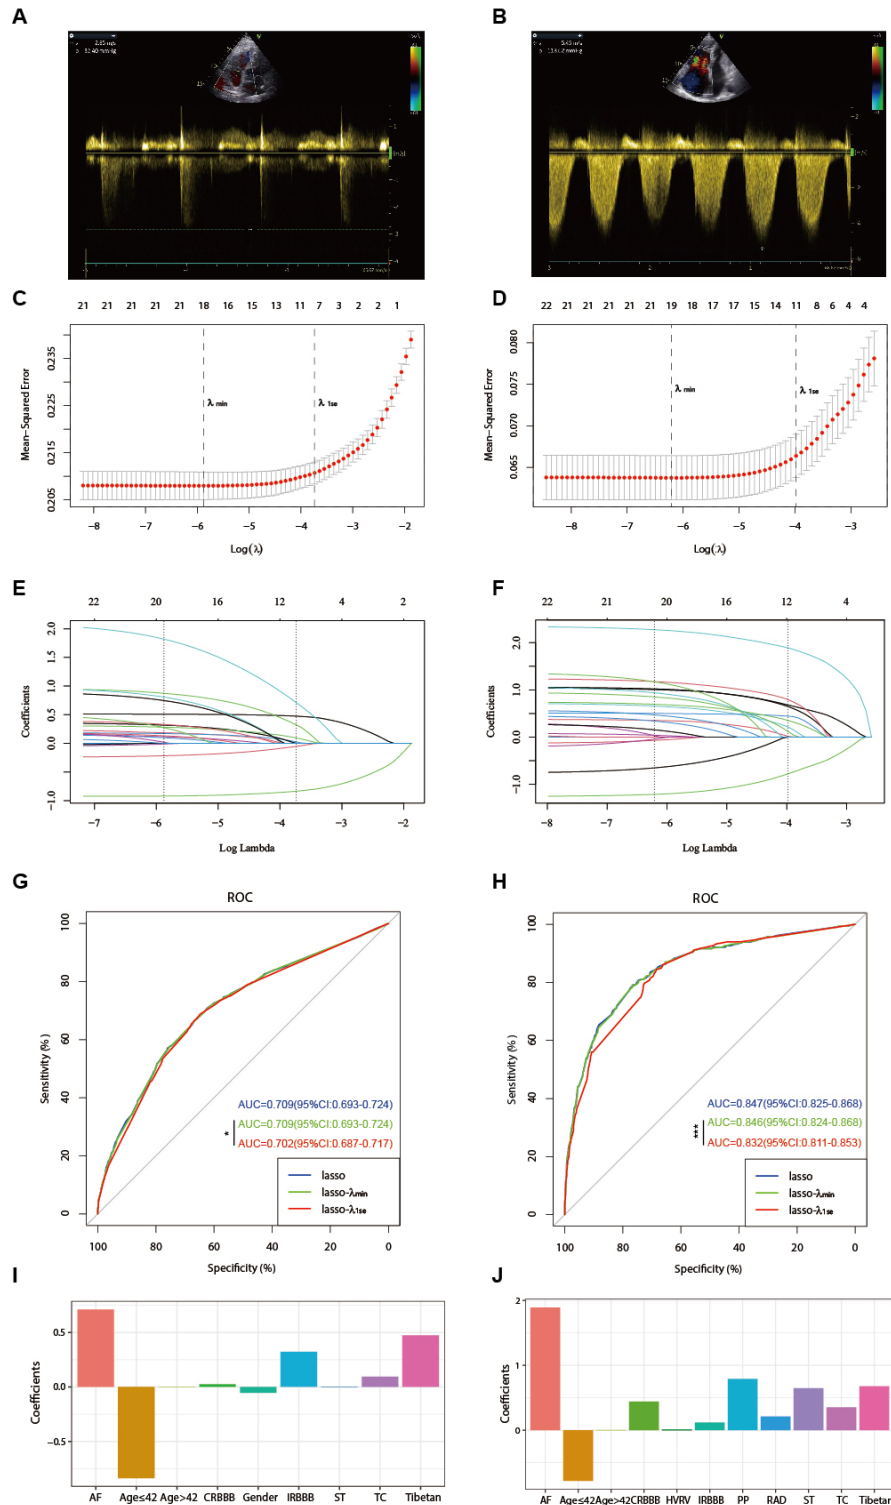

184

185

186

Figure 2 illustrates the optimal predictive variables as determined by the LASSO binary

187

logistic regression model. Panels A and B depict the measurement of tricuspid regurgitation

188 spectra via transthoracic echocardiography in patients with Grade I PH (A) and Grade III PH (B).  
189 Panels C to J demonstrate the identification of the optimal penalisation coefficient lambda ( $\lambda$ ) in  
190 the LASSO model using 10-fold cross-validation for the PH $\geq$ I grade group (C) and the PH $\geq$ II  
191 grade group (D). The dotted line on the left ( $\lambda_{\min}$ ) represents the value of the harmonic  
192 parameter  $\log(\lambda)$  at which the model's error is minimised, and the dotted line on the right ( $\lambda_{1se}$ )  
193 indicates the value of the harmonic parameter  $\log(\lambda)$  at which the model's error is minimal minus 1  
194 standard deviation. The LASSO coefficient profiles of 22 predictive factors for the PH $\geq$ I grade  
195 group (E) and the PH $\geq$ II grade group (F) show that as the value of  $\lambda$  decreased, the degree of  
196 model compression increased, enhancing the model's ability to select significant variables. ROC  
197 curves were constructed for three models (LASSO, LASSO- $\lambda_{\min}$ , LASSO- $\lambda_{1se}$ ) in both the PH  
198  $\geq$ I grade group (G) and the PH $\geq$ II grade group (H). Histograms depict the final variables selected  
199 according to  $\lambda_{1se}$  and their coefficients for the PH $\geq$ I grade group (I) and the PH $\geq$ II grade group  
200 (J). Asterisks denote levels of statistical significance: \*P < 0.05, \*\*P < 0.01, \*\*\*P < 0.001.

201

202 *Construction of Nomogram<sup>I</sup> in PH $\geq$ I grade group and Nomogram<sup>II</sup> in PH $\geq$ II grade group*

203

204 In the PH $\geq$ I grade group, a predictive Nomogram<sup>I</sup> for PH $\geq$ I grade was developed based on  
205 independent risk factors, including gender, Tibetan ethnicity, age, IRBBB, AF, ST, and TC. Points  
206 are assigned to each independent factor by drawing a vertical line to the points scale. The total  
207 points for an individual correspond to their risk of developing PH. Patients were then classified  
208 into high-risk and low-risk subgroups according to the total score's cut-off value (cut-off value:  
209 45), which was determined based on the ROC curve (Fig. 3 A). The risks for the two groups were  
210 evaluated in both the derivation and validation sets. In the derivation set, the risk of PH in the



211 high-risk group was significantly higher than in the low-risk group (odds ratio [OR]: 4.210, 95%  
212 confidence interval [CI]: 3.715-4.775) (Fig. 3 B), as was also observed in the validation set (odds  
213 ratio [OR]: 4.207, 95% confidence interval [CI]: 3.476-5.102) (Fig. 3 C).

214 In the PH $\geq$ II grade group, a predictive Nomogram<sup>II</sup> for PH $\geq$ II grade was developed using  
215 independent risk factors, including Tibetan ethnicity, age, RAD, HVRV, IRBBB, AF, PP, ST and  
216 TC. Based on the cut-off value of the total score (cut-off value: 76), determined in line with the  
217 ROC curve, patients were categorised into high-risk and low-risk subgroups (Fig. 3 D). The risks  
218 for the two groups were evaluated in both the derivation and validation sets. In the derivation set,  
219 the risk of PH in the high-risk group was significantly greater than in the low-risk group (odds  
220 ratio [OR]: 11.591, 95% confidence interval [CI]: 9.128-14.845) (Fig. 3 E), a finding that was  
221 replicated in the validation set (odds ratio [OR]: 7.103, 95% confidence interval [CI]: 5.106-9.966)  
222 (Fig. 3 F)

223 .

224

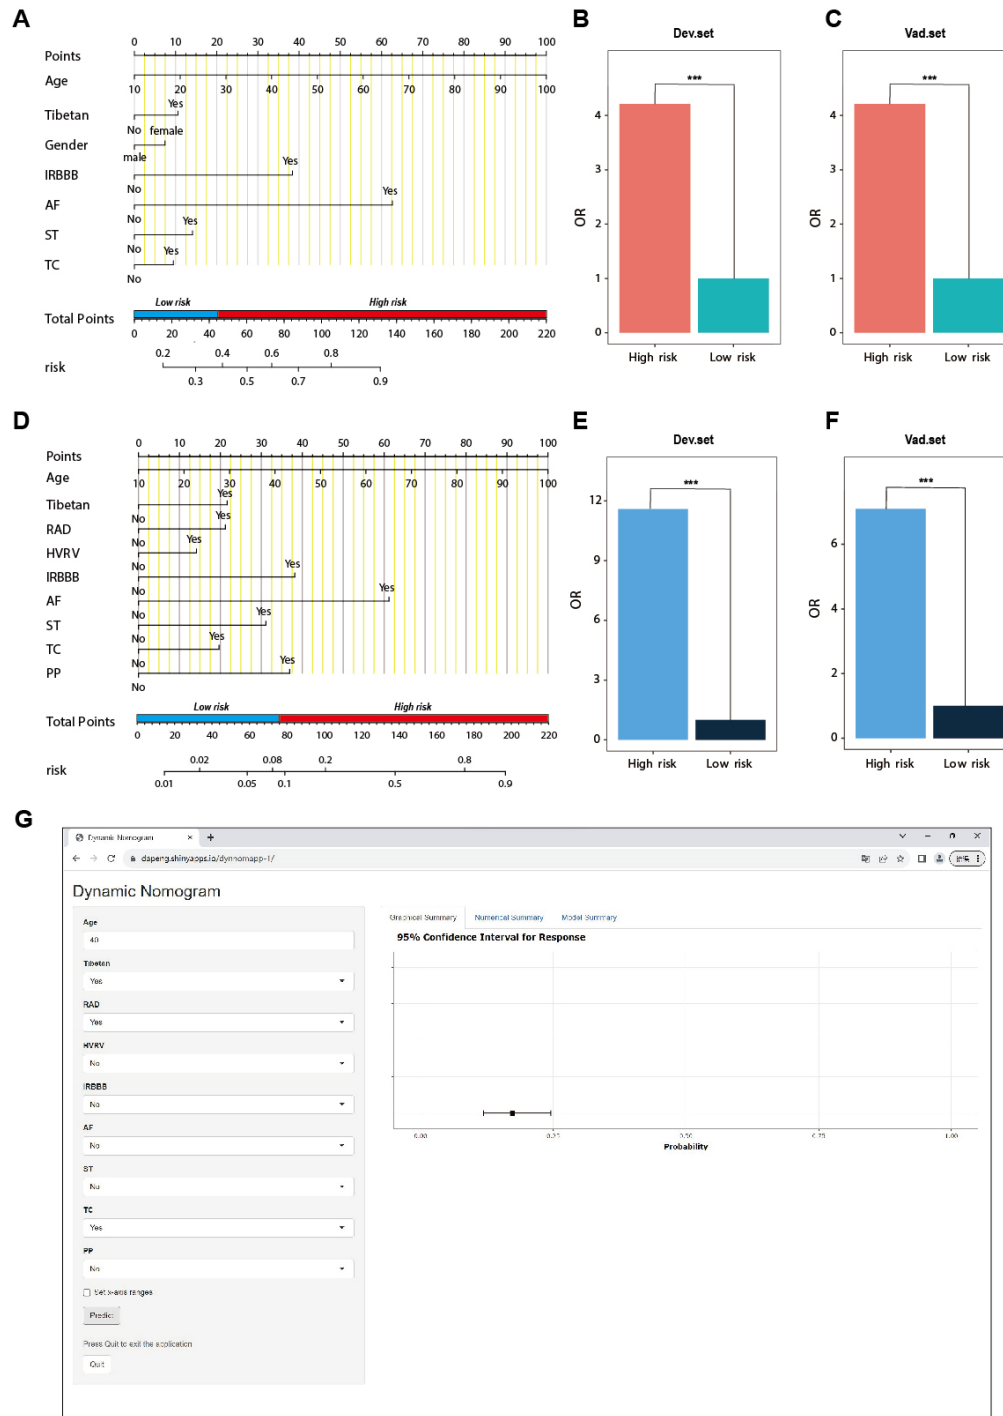

225

226 Figure 3. Nomogram for predicting PH and risk stratification based on total score. (A-C)

227 Nomogram<sup>I</sup> for the prediction of PH ≥ I grade in the PH ≥ I grade group. Points for each

228 independent factor are summed to calculate total points, determining the corresponding 'risk' level.

229 Patients were divided into ‘High-risk’ and ‘Low-risk’ subgroups according to the cutoff of the total  
230 points (A). Histograms illustrate the odds ratio (OR) comparing the ‘High-risk’ group to the  
231 ‘Low-risk’ group in the derivation set (B) and validation set (C). (D-F) Nomogram<sup>II</sup> for predicting  
232 PH $\geq$ II grade within the PH $\geq$ II grade group: Similarly, points from each independent factor are  
233 totalled, and the corresponding ‘risk’ level is ascertained. Patients are divided into ‘High-risk’ and  
234 ‘Low-risk’ groups based on the cut-off value of the total points (D). Histograms display the OR for  
235 the ‘High-risk’ group compared to the ‘Low-risk’ group in the derivation (E) and validation set (F).  
236 \*\*\* P < 0.001. (G) Screenshot of dynamic Nomogram<sup>III</sup>'s web page.  
237

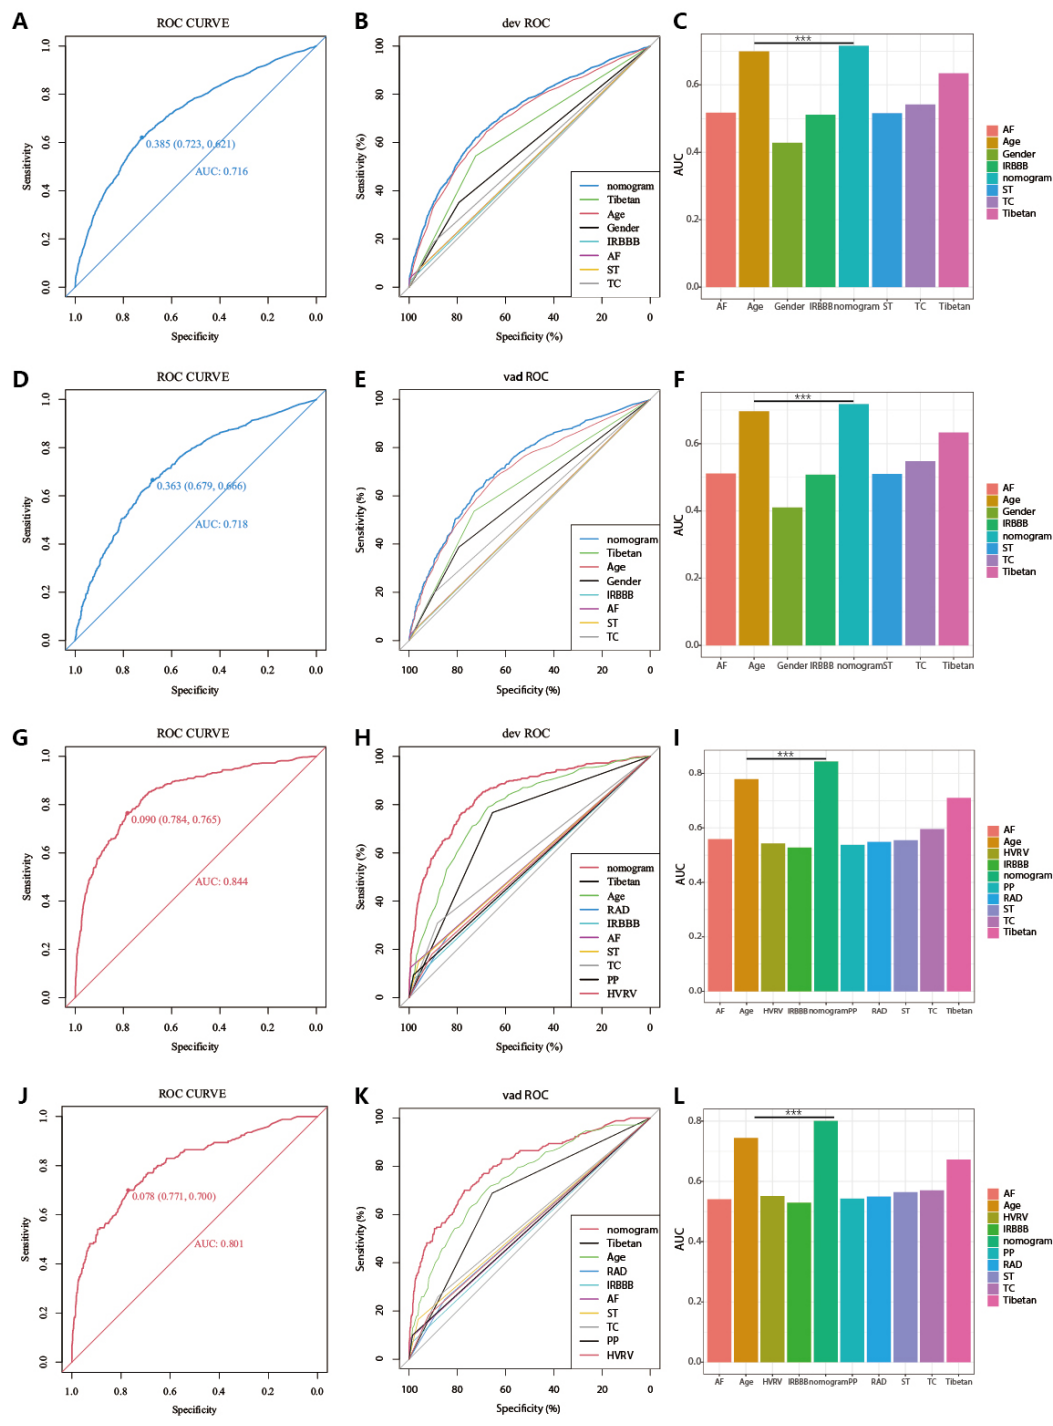

238

239

Figure 4. Receiver operating characteristic (ROC) curves and area under the curve (AUC)

240

for Nomogram<sup>I</sup> in PH≥I and Nomogram<sup>II</sup> in PH≥II grade groups. (A-F) In the PH≥I grade group,

241

the ROC and corresponding AUC of Nomogram<sup>I</sup> and independent factors in the derivation set

242 (A-C) and validation set (D-F). (G-L) In the PH $\geq$ II grade group, the ROC and corresponding AUC  
 243 of Nomogram<sup>II</sup> and independent factors in the derivation set (G-I) and validation set (J-L).  
 244

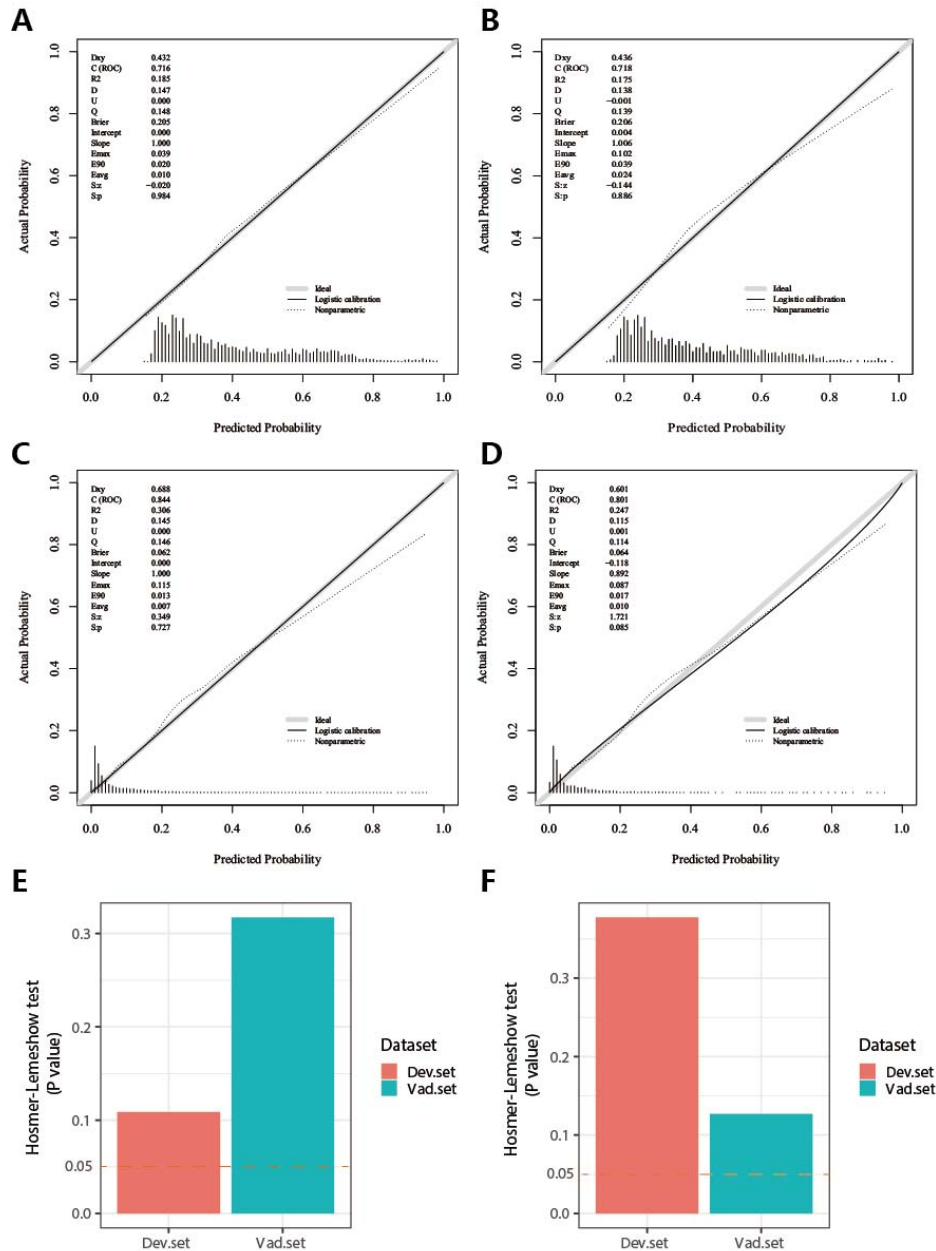

245  
 246 Figure 5. Calibration plots and Hosmer-Lemeshow test results for Nomogram<sup>I</sup> in PH $\geq$ I and  
 247 Nomogram<sup>II</sup> in PH $\geq$ II grade groups. (A-B) In the PH $\geq$ I grade group, the calibration plots of  
 248 Nomogram<sup>I</sup> in the derivation set (A) and the validation set (B). (C-D) In the PH $\geq$ II grade group,

249 the calibration plots of Nomogram<sup>II</sup> in the derivation set (C) and the validation set (D). (E) In the  
250 PH $\geq$ I grade group, Hosmer-Lemeshow test results for Nomogram<sup>I</sup> in the derivation set and the  
251 validation set. (F) In the PH $\geq$ II grade group, Hosmer-Lemeshow test results for Nomogram<sup>II</sup> in the  
252 derivation set and the validation set.

253

254 *Assessment and validation of Nomogram<sup>I</sup> in the PH $\geq$ I grade group and Nomogram<sup>II</sup> in the*  
255 *PH $\geq$ II grade group*

256

257 In the PH $\geq$ I grade group, Nomogram<sup>I</sup> was developed to predict the risk of PH $\geq$ I grade,  
258 utilising the AUC to assess its discriminative ability. The AUC value for Nomogram<sup>I</sup> was 0.716  
259 (95% confidence interval [CI]: 0.701 - 0.731) in the derivation set (Fig 4. A) and 0.718 (95%  
260 confidence interval [CI]: 0.695 - 0.741) in the validation set (Fig 4. D). Furthermore, ROC curves  
261 were used to compare the discriminative capacity of Nomogram<sup>I</sup> and single independent factors in  
262 predicting PH $\geq$ I grade. Notably, the AUC of Nomogram<sup>I</sup> was significantly higher than that of any  
263 single independent factor in the derivation (Fig 4. B, C) and the validation set (Fig 4. E, F). The  
264 calibration curves for the derivation set (Fig 5. A) and the validation set (Fig 5. B) demonstrated  
265 high agreement between predicted and actual values, indicating that Nomogram<sup>I</sup> accurately  
266 predicts PH $\geq$ I grade. The results of the Hosmer-Lemeshow test in both the derivation set  
267 (P=0.109 > 0.05) and the validation set (P=0.317 > 0.05) further confirmed the effective  
268 performance of Nomogram<sup>I</sup> (Fig 5. E).

269 Nomogram<sup>II</sup> was developed to predict the risk of PH $\geq$ II grade. The AUC for Nomogram<sup>II</sup>  
270 was 0.844 (95% confidence interval [CI]: 0.823 - 0.865) in the derivation set (Fig 4. G) and 0.801  
271 (95% confidence interval [CI]: 0.763 - 0.838) in the validation set (Fig 4. J). Furthermore, ROC

272 curves were used to compare the discriminative capacity of Nomogram<sup>II</sup> and individual  
273 independent factors in predicting PH $\geq$ II grade. The AUC of Nomogram<sup>II</sup> was significantly higher  
274 than that of any single independent factor in the derivation set (Fig 4. H, I) and the validation set  
275 (Fig 4. K, L). The calibration curves for the derivation set (Fig 5. C) and the validation set (Fig 5.  
276 D) demonstrated high agreement between the predicted and actual values, indicating that  
277 Nomogram<sup>II</sup> accurately predicts PH $\geq$ II grade. Additionally, the results of the Hosmer-Lemeshow  
278 test in the derivation set ( $P=0.377 > 0.05$ ) and the validation set ( $P=0.127 > 0.05$ ) further  
279 confirmed the good performance of Nomogram<sup>II</sup> (Fig 5. F).

280  
281  
282

#### *Clinical utility of Nomogram<sup>I</sup> and Nomogram<sup>II</sup>*

283 In the PH $\geq$ I grade group, the clinical utility of Nomogram<sup>I</sup> for predicting the risk of PH $\geq$ I  
284 grade was assessed using DCA. This analysis revealed a significant net benefit with a threshold  
285 probability range of 20% to 91% in the derivation set (Fig 6. A) and 14% to 74% in the validation  
286 set (Fig 6. B). Moreover, the DCA curve from the derivation set indicated that the clinical  
287 predictive capability of Nomogram<sup>I</sup> surpassed that of any single independent factor, a finding that  
288 was corroborated in the validation set (Fig 6. C, D).

289

290 In the PH $\geq$ II grade group, the clinical utility of Nomogram<sup>II</sup> for predicting the risk of PH $\geq$ II  
291 grade was evaluated using DCA, which showed a clear net benefit within the threshold probability  
292 range of 1% to 70% in the derivation set (Fig 6. E) and 1% to 82% in the validation set (Fig 6. F).  
293 Additionally, the DCA curve for the derivation set demonstrated that the clinical predictive  
294 effectiveness of Nomogram<sup>II</sup> exceeded that of any single independent factor, a conclusion that was

295 also confirmed in the validation set (Fig 6. G, H).

296

297

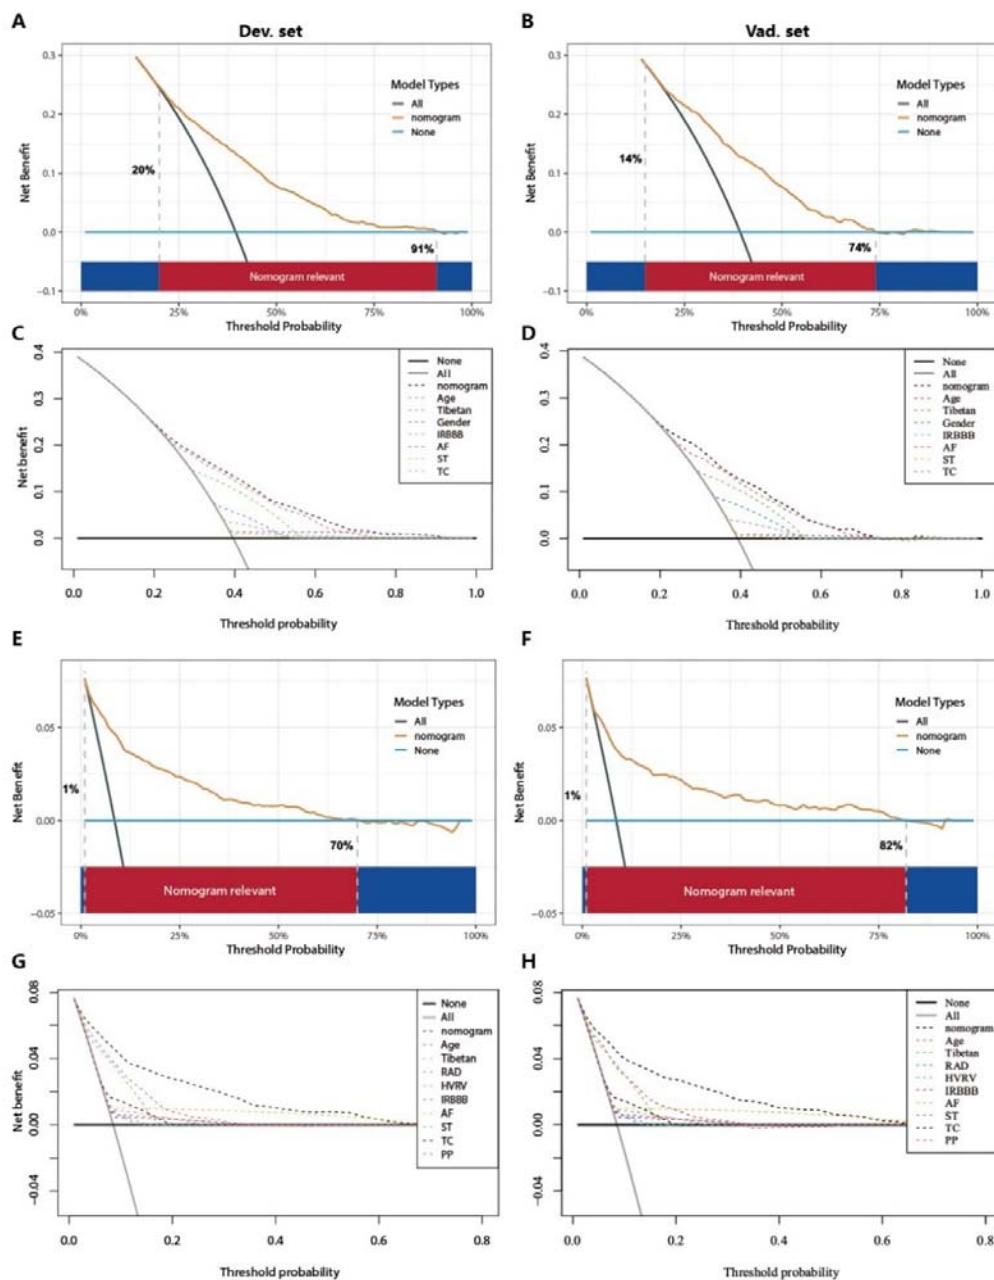

298

299 Figure 6. Decision curve analysis (DCA) for Nomogram<sup>I</sup> in the PH $\geq$ I grade and Nomogram<sup>II</sup>

300 in the PH $\geq$ II grade group. (A-D) In the PH $\geq$ I grade group, the DCAs of Nomogram<sup>I</sup> and

301 independent factors in the derivation (A, C) and validation set (B, D). (E-H) In the PH $\geq$ II grade



302 group, the DCAs of Nomogram<sup>II</sup> and independent factors in the derivation (E, G) and validation  
303 set (F, H).

304

### 305 *Comparison between Nomogram<sup>I</sup> and Nomogram<sup>II</sup>*

306 In the PH $\geq$ I grade group, when comparing Nomogram<sup>I</sup> to Nomogram<sup>II</sup>, Nomogram<sup>I</sup> exhibited  
307 an IDI of -0.0012 (95% CI: -0.0032 to 0.0009, p=0.2777), a categorical NRI of 0.0117 (95% CI:  
308 -0.0004 to 0.0237, p=0.0575), and a continuous NRI of -0.2423 (95% CI: -0.2992 to -0.1854,  
309 p<0.001) in predicting the risk of PH $\geq$ I grade.

310 In the PH $\geq$ II grade group, compared to Nomogram<sup>I</sup>, Nomogram<sup>II</sup> demonstrated an IDI of  
311 0.0366 (95% CI: 0.0247 to 0.0485, p<0.001), a categorical NRI of 0.0301 (95% CI: 0.0093 to  
312 0.0510, p<0.05), and a continuous NRI of 0.2785 (95% CI: 0.1824 to 0.3745, p<0.001) for  
313 predicting the risk of PH $\geq$ II grade.

314 These results indicate that Nomogram<sup>II</sup> outperformed Nomogram<sup>I</sup> in terms of IDI and NRI  
315 values.

### 316 *Website of Nomogram<sup>II</sup>*

317 Patients and physicians can calculate the risk of pulmonary hypertension through a free  
318 web-based dynamic Nomogram<sup>II</sup> (<https://dapeng.shinyapps.io/dynnomapp-1/>), and the screenshot  
319 of dynamic Nomogram<sup>II</sup>'s web page was shown (Fig 3. G).

320

## 321 **Discussion**

322 A significant portion of the global population lives in high-altitude areas such as the Tibetan  
323 Plateau, Ethiopian Highlands, Andes Mountains, and Pamir Plateau. These regions are marked by

324 an extremely hypoxic environment that leads to alveolar hypoxia, posing severe risks to the  
325 cardiopulmonary system. One such risk is the development of PH, which occurs through  
326 mechanisms like hypoxic pulmonary vasoconstriction and pulmonary vascular remodelling  
327 (Burtscher, Gatterer, Burtscher, & Mairböurl, 2018; Sydykov et al., 2021; Wilkins, Ghofrani,  
328 Weissmann, Aldashev, & Zhao, 2015). Accurate, timely diagnosis and early, effective treatment  
329 are crucial for the clinical improvement and survival of patients with PH. Without prompt  
330 intervention, PH can impair right heart function and ultimately result in fatal right heart failure  
331 (Benza et al., 2010; Kim & George, 2019; McGoon et al., 2004). Thus, there is a need to develop a  
332 predictive model to estimate the risk of PH, facilitating risk stratification and management. In this  
333 study, we analysed routine electrocardiogram examination indicators and basic demographic  
334 information to assess the risk of PH. We developed nomograms for the PH $\geq$ I grade group and the  
335 PH $\geq$ II grade group, and the performance of these nomograms was evaluated and validated.

336 Currently, TTE is widely utilised for large-scale, non-invasive screening of patients at risk for  
337 PH (D'Alto et al., 2018; Habib & Torbicki, 2010; Janda, Shahidi, Gin, & Swiston, 2011). However,  
338 in plateau regions such as Tibet, medical resources are relatively limited, and remote villages and  
339 towns lack the facilities for TTE examinations. ECG examinations, being easy to administer,  
340 cost-effective, and feasible for remote delivery through telemedicine, offer a practical alternative  
341 (Ismail, Jovanovic, Ramzan, & Rabah, 2023). A retrospective analysis has demonstrated that ECG  
342 examination results correlate with clinical parameters reflecting the severity of PH (Michalski et  
343 al., 2022). Therefore, in developing this model, we primarily relied on ECG examination results  
344 from patients. Utilising ECG results as predictors of PH can significantly aid clinicians in  
345 identifying potential PH patients in remote plateau areas, facilitating their access to timely and

346 relevant treatment.

347 In this study, based on sPAP assessed by TTE examination, patients at risk of PH were  
348 classified into grades I-III. We developed and validated two nomograms for the PH $\geq$ I grade group  
349 (Nomogram<sup>I</sup>) and the PH $\geq$ II grade group (Nomogram<sup>II</sup>), with ECG examination results serving as  
350 the primary component for both. Nomogram<sup>I</sup> included seven variables: gender, Tibetan ethnicity,  
351 age, IRBBB, AF, ST, and TC. Nomogram<sup>II</sup> incorporated nine variables: Tibetan ethnicity, age,  
352 RAD, HVRV, IRBBB, AF, PP, ST, and TC (Fig 3. A, D). These variables are readily available  
353 from routine ECG examinations. Additionally, patients were categorised into high-risk and  
354 low-risk groups based on the cut-off value of the total score in the nomogram, with the OR value  
355 for the high-risk group being significantly higher than that of the low-risk group (Fig 3). Therefore,  
356 both nomograms offer a useful and straightforward method for in-depth evaluation, even without  
357 medical professional intervention. Both Nomogram<sup>I</sup> and Nomogram<sup>II</sup> demonstrated good  
358 calibration and clinical utility (Fig 5, 6), though ROC analysis revealed that the AUC for  
359 Nomogram<sup>II</sup> was higher than that for Nomogram<sup>I</sup> (0.844 vs 0.716). IDI and NRI are recognised  
360 indicators that describe improved accuracy in predicting binary, multi-classification, or survival  
361 outcomes (Wang, Cheng, Seaberg, & Becker, 2020). In a similar vein to a 10-year retrospective  
362 cohort study, which constructed two nomograms for hypertension risk prediction and compared  
363 them using IDI and NRI values (Deng et al., 2021), we used IDI and NRI to evaluate the  
364 performance of Nomogram<sup>I</sup> and Nomogram<sup>II</sup>. Our findings indicated no significant difference  
365 between Nomogram<sup>I</sup> and Nomogram<sup>II</sup> in the PH $\geq$ I grade group; however, Nomogram<sup>II</sup> exhibited  
366 superior performance compared to Nomogram<sup>I</sup> in the PH $\geq$ II grade group, thus demonstrating its  
367 enhanced predictive capability. So, we created an online dynamic Nomogram<sup>II</sup> for doctors and

368 patients to calculate the risk of PH (Fig 3. G).

369 In this study, age and Tibetan ethnicity were identified as independent predictors of PH, a  
370 finding that aligns with conclusions from a single-centre, cross-sectional study among native  
371 Tibetans in Sichuan Province, China (Gou et al., 2020). We hypothesise that this association may  
372 be due to the longer exposure to the hypoxic environment at high altitudes experienced by older  
373 individuals and Tibetans, promoting hypoxic contraction of pulmonary blood vessels and  
374 subsequent pulmonary vascular remodelling, thereby leading to PH. Additionally, the occurrence  
375 of AF emerged as an independent predictor of PH with the highest OR values in both nomograms  
376 (Table 2, 3). PH is known to be characterised by pulmonary vascular remodelling, which can  
377 induce fibrosis and excessive myocardial apoptosis, ultimately contributing to AF (Yi et al., 2023),  
378 a finding that corroborates our results. Nonetheless, it was observed that no single predictor alone  
379 was effective in distinguishing PH, exhibiting poor clinical utility compared to the comprehensive  
380 approach offered by the nomogram (Fig 4, Fig 6).

381 Our study has several limitations. Firstly, TTE serves only as a screening method for PH and  
382 is not the gold standard; its results merely indicate the risk of PH in the examined individuals.  
383 Secondly, given the constrained medical resources in remote areas, we primarily incorporated  
384 readily ECG results and basic demographic information into the nomograms, resulting in a  
385 relatively simple set of independent predictors. Lastly, the dataset for this study was exclusively  
386 sourced from Tibet, China, meaning the validation of the nomograms lacks external validation  
387 sets.

## 388 **Conclusion**

389 We have developed a reliable and straightforward nomogram to predict the risks associated

390 with PH, demonstrating satisfactory discrimination and calibration. Upon rigorous validation  
391 using internal datasets, the nomogram has shown clinical utility and favourable predictive  
392 accuracy. It is anticipated to serve as an effective and convenient clinical tool for assessing the risk  
393 of PH in populations residing at high altitudes.

394

#### 395 **Acknowledgements**

396 This study was funded by the Talent Program of Army Medical University (No. 2019R038).

397

#### 398 **Statements and Declarations**

399 The authors have no conflict of interest.

400

#### 401 **Data availability statement**

402 Source data files have been provided.

403

#### 404 **References**

405

406 Benza, R. L., Miller, D. P., Gomberg-Maitland, M., Frantz, R. P., Foreman, A. J., Coffey, C. S., . . .  
407 McGoon, M. D. (2010). Predicting survival in pulmonary arterial hypertension: insights from the  
408 Registry to Evaluate Early and Long-Term Pulmonary Arterial Hypertension Disease Management  
409 (REVEAL). *Circulation*, 122:164-172. doi:10.1161/circulationaha.109.898122

410

411 Burtscher, M., Gatterer, H., Burtscher, J., & Mairbäurl, H. (2018). Extreme Terrestrial  
412 Environments: Life in Thermal Stress and Hypoxia. A Narrative Review. *Front Physiol*, 9:572.  
413 doi:10.3389/fphys.2018.00572

414

415 D'Alto, M., Bossone, E., Opatowsky, A. R., Ghio, S., Rudski, L. G., & Naeije, R. (2018).  
416 Strengths and weaknesses of echocardiography for the diagnosis of pulmonary hypertension. *Int J*  
417 *Cardiol*, 263: 177-183. doi:10.1016/j.ijcard.2018.04.024

418

- 419 Deng, X., Hou, H., Wang, X., Li, Q., Li, X., Yang, Z., & Wu, H. (2021). Development and  
420 validation of a nomogram to better predict hypertension based on a 10-year retrospective cohort  
421 study in China. *Elife*, 10. doi:10.7554/eLife.66419  
422
- 423 Dunham-Snary, K. J., Wu, D., Sykes, E. A., Thakrar, A., Parlow, L. R. G., Mewburn, J. D., . . .  
424 Archer, S. L. (2017). Hypoxic Pulmonary Vasoconstriction: From Molecular Mechanisms to  
425 Medicine. *Chest*, 151: 181-192. doi:10.1016/j.chest.2016.09.001  
426
- 427 Gassmann, M., Cowburn, A., Gu, H., Li, J., Rodriguez, M., Babicheva, A., . . . Zhao, L. (2021).  
428 Hypoxia-induced pulmonary hypertension-Utilizing experiments of nature. *Br J Pharmacol*, 178:  
429 121-131. doi:10.1111/bph.15144  
430
- 431 Gou, Q., Shi, R., Zhang, X., Meng, Q., Li, X., Rong, X., . . . Chen, X. (2020). The Prevalence and  
432 Risk Factors of High-Altitude Pulmonary Hypertension Among Native Tibetans in Sichuan  
433 Province, China. *High Alt Med Biol*, 21: 327-335. doi:10.1089/ham.2020.0022  
434
- 435 Habib, G., & Torbicki, A. (2010). The role of echocardiography in the diagnosis and management  
436 of patients with pulmonary hypertension. *Eur Respir Rev*, 19: 288-299.  
437 doi:10.1183/09059180.00008110
- 438 Hoepfer, M. M., Humbert, M., Souza, R., Idrees, M., Kawut, S. M., Sliwa-Hahnle, K., . . . Gibbs, J.  
439 S. (2016). A global view of pulmonary hypertension. *Lancet Respir Med*, 4: 306-322.  
440 doi:10.1016/s2213-2600(15)00543-3  
441
- 442 Hong, C., Chen, R., Hu, L., Liu, H., Lu, J., Zhuang, C., . . . Zheng, Z. (2023). Aetiological  
443 distribution of pulmonary hypertension and the value of transthoracic echocardiography screening  
444 in the respiratory department: A retrospective analysis from China. *Clin Respir J*, 17: 536-547.  
445 doi:10.1111/crj.13623  
446
- 447 Ismail, A. R., Jovanovic, S., Ramzan, N., & Rabah, H. (2023). ECG Classification Using an  
448 Optimal Temporal Convolutional Network for Remote Health Monitoring. *Sensors (Basel)*, 23:  
449 doi:10.3390/s23031697  
450
- 451 Janda, S., Shahidi, N., Gin, K., & Swiston, J. (2011). Diagnostic accuracy of echocardiography for  
452 pulmonary hypertension: a systematic review and meta-analysis. *Heart*, 97: 612-622.  
453 doi:10.1136/hrt.2010.212084  
454
- 455 Julian, C. G., & Moore, L. G. (2019). Human Genetic Adaptation to High Altitude: Evidence from  
456 the Andes. *Genes (Basel)*, 10. doi:10.3390/genes10020150  
457
- 458 Kim, D., & George, M. P. (2019). Pulmonary Hypertension. *Med Clin North Am*, 103: 413-423.  
459 doi:10.1016/j.mcna.2018.12.002  
460
- 461 Mandras, S. A., Mehta, H. S., & Vaidya, A. (2020). Pulmonary Hypertension: A Brief Guide for  
462 Clinicians. *Mayo Clin Proc*, 95: 1978-1988. doi:10.1016/j.mayocp.2020.04.039

463

464 McGoon, M., Gutterman, D., Steen, V., Barst, R., McCrory, D. C., Fortin, T. A., & Loyd, J. E.  
465 (2004). Screening, early detection, and diagnosis of pulmonary arterial hypertension: ACCP  
466 evidence-based clinical practice guidelines. *Chest*, 126(1 Suppl), 14s-34s.  
467 doi:10.1378/chest.126.1\_suppl.14S

468

469 Michalski, T. A., Pszczola, J., Lisowska, A., Knapp, M., Sobkowicz, B., Kaminski, K., &  
470 Ptaszynska-Kopczynska, K. (2022). ECG in the clinical and prognostic evaluation of patients with  
471 pulmonary arterial hypertension: an underestimated value. *Ther Adv Respir Dis*, 16:  
472 17534666221087846. doi:10.1177/17534666221087846

473

474 Moore, L. G., Niermeyer, S., & Zamudio, S. (1998). Human adaptation to high altitude: regional  
475 and life-cycle perspectives. *Am J Phys Anthropol*, Suppl 27: 25-64.  
476 doi:10.1002/(sici)1096-8644(1998)107:27+<25::aid-ajpa3>3.0.co;2-1

477

478 Naeije, R., Richter, M. J., & Rubin, L. J. (2022). The physiological basis of pulmonary arterial  
479 hypertension. *Eur Respir J*, 59. doi:10.1183/13993003.02334-2021

480

481 Penalzoza, D., & Arias-Stella, J. (2007). The heart and pulmonary circulation at high altitudes:  
482 healthy highlanders and chronic mountain sickness. *Circulation*, 115: 1132-1146.  
483 doi:10.1161/circulationaha.106.624544

484

485 Rubin, L. J., & Naeije, R. (2023). Sotatercept for pulmonary arterial hypertension: something old  
486 and something new. *Eur Respir J*, 61. doi:10.1183/13993003.01972-2022

487

488 Ruopp, N. F., & Cockrill, B. A. (2022). Diagnosis and Treatment of Pulmonary Arterial  
489 Hypertension: A Review. *Jama*, 327: 1379-1391. doi:10.1001/jama.2022.4402

490

491 Shah, A. J., Beckmann, T., Vorla, M., & Kalra, D. K. (2023). New Drugs and Therapies in  
492 Pulmonary Arterial Hypertension. *Int J Mol Sci*, 24. doi:10.3390/ijms24065850

493

494 Simonneau, G., Montani, D., Celermajer, D. S., Denton, C. P., Gatzoulis, M. A., Krowka, M., . . .  
495 Souza, R. (2019). Haemodynamic definitions and updated clinical classification of pulmonary  
496 hypertension. *Eur Respir J*, 53. doi:10.1183/13993003.01913-2018

497

498 Sydykov, A., Mamazhakypov, A., Maripov, A., Kosanovic, D., Weissmann, N., Ghofrani, H. A., . . .  
499 Schermuly, R. T. (2021). Pulmonary Hypertension in Acute and Chronic High Altitude  
500 Maladaptation Disorders. *Int J Environ Res Public Health*, 18. doi:10.3390/ijerph18041692

501

502 Wang, Z., Cheng, Y., Seaberg, E. C., & Becker, J. T. (2020). Quantifying diagnostic accuracy  
503 improvement of new biomarkers for competing risk outcomes. *Biostatistics*.  
504 doi:10.1093/biostatistics/kxaa048

505

506 West, J. B. (2012). High-altitude medicine. *Am J Respir Crit Care Med*, 186: 1229-1237.

507 doi:10.1164/rccm.201207-1323CI

508

509 Wilkins, M. R., Ghofrani, H. A., Weissmann, N., Aldashev, A., & Zhao, L. (2015).

510 Pathophysiology and treatment of high-altitude pulmonary vascular disease. *Circulation*, 131:

511 582-590. doi:10.1161/circulationaha.114.006977

512

513 Xu, X. Q., & Jing, Z. C. (2009). High-altitude pulmonary hypertension. *Eur Respir Rev*, 18: 13-17.

514 doi:10.1183/09059180.00011104

515

516 Yi, Y., Tianxin, Y., Zhangchi, L., Cui, Z., Weiguo, W., & Bo, Y. (2023). Pinocembrin attenuates

517 susceptibility to atrial fibrillation in rats with pulmonary arterial hypertension. *Eur J Pharmacol*,

518 960: 176169. doi:10.1016/j.ejphar.2023.176169

519



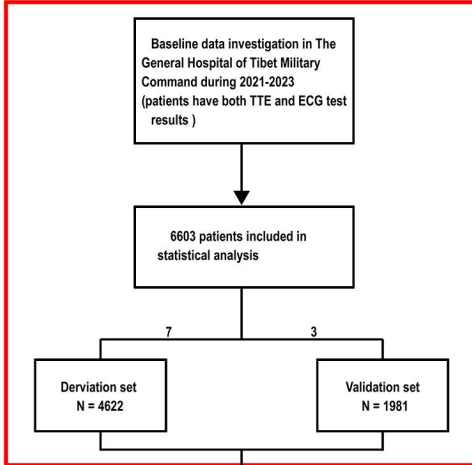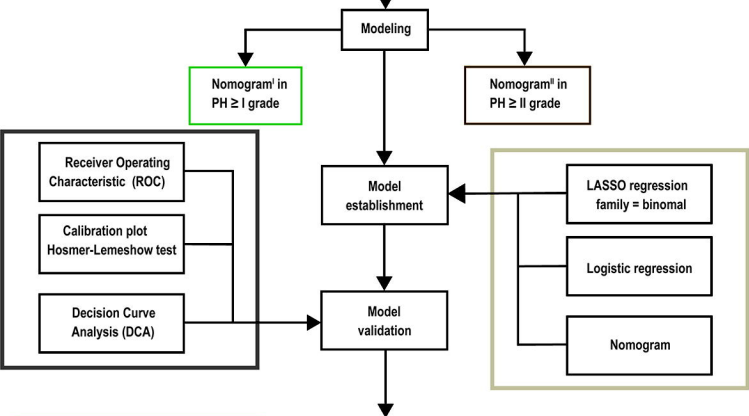

Introducing factors of Age, Tibetan ethnicity, Gender, IRBBB, AF, ST and TC, the risk nomogram<sup>l</sup> is beneficial for prediction of PH  $\geq$  I grade risk in population living in high altitude localities.

Introducing factors of Age, Tibetan ethnicity, RAD, HVRV, IRBBB, AF, ST, TC and PP, the risk nomogram<sup>h</sup> is beneficial for prediction of PH  $\geq$  II grade risk in population living in high altitude localities.

### Results

**Conclusions**

The nomogram risk models of Nomogram<sup>l</sup> and Nomogram<sup>h</sup> are both well established and useful, and the model of Nomogram<sup>h</sup> performs better.
